# Supplementary material for: Applicability of the Linearized Poisson-Boltzmann Theory to Contact Angle problems and Application to the Carbon Dioxide-Brine-Solid Systems
Source: Research Square preprint supplement (doi:10.21203/rs.3.rs-927983/v1), 2021-09-27

**Appendices for manuscript**

Appendix 1: Contact angle on mica for CO2-brine-mica systems (Jafari and Jung (2018)


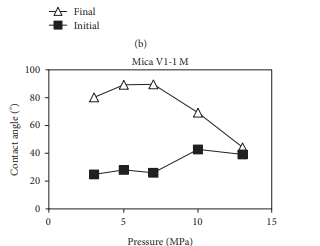


Appendix 2: CO2-brine contact angle on quartz surface versus pressure (Farokhpoor et al., 2013)


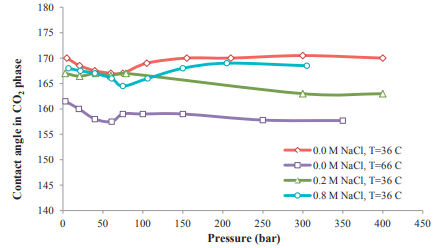


Appendix 3: Receding contact angles for sandstone/CO2/DI water as a function of pressure and temperature; RMS = 540 nm, SD = 3. Alnili, et al., (2018)


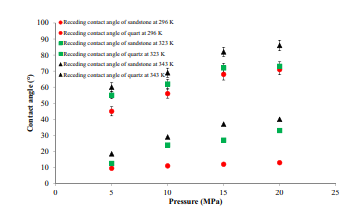

Supplement: Supplementary file 1 [file 510acb81b072d8c4a6c2f71d.docx]
